# Supplementary material for: Adverse events following computed tomographic colonography compared to optical colonoscopy in the elderly
Source: PubMed Central journal article supplement — Prev Med Rep. 2014 Aug 13;1:3–8. doi: 10.1016/j.pmedr.2014.08.001 (PMC4266938; doi:10.1016/j.pmedr.2014.08.001), 2014-08-13
Supplement: NIHMS635037-supplement.pdf [file NIHMS635037-supplement.pdf]

**Electronic Table 1: Identification codes for all procedures and diagnoses**

| <b>Variable</b>                                                                       | <b>CPT / HCPCS and ICD-9-CM codes</b>                                                                                                                        |
|---------------------------------------------------------------------------------------|--------------------------------------------------------------------------------------------------------------------------------------------------------------|
| <i>Type of Examination</i>                                                            |                                                                                                                                                              |
| CT Colonography                                                                       | 0066T, 0067T                                                                                                                                                 |
| Optical Colonoscopy                                                                   | 45378, 44388, 45380, 44389, 45384, 44392, 45385, 44394, 45382, 44391, 45379, 45381, 45383, 45384, 45386, 45387, 44390, 44393, 44397                          |
| <i>Indication</i>                                                                     |                                                                                                                                                              |
| Asymptomatic                                                                          | V76.41, V76.51, G0121, G0105, V16.0, V10.05, V10.06, 153.X, 154.X, V12.72, 569.0, 211.3, 211.4, 556.X, 555.X                                                 |
| Symptomatic                                                                           | 787.3, 789.X, 280.XX, 285.XX, 564.XX, 569.89, 569.9, 558.XX, 787.XX, 9.2, 9.3, 783.0, 783.20-783.22, 569.3, 578.XX, 792.1, 560.X, 552.0, V47.1, 751.5, 793.4 |
| <i>Comorbidity associated with gastrointestinal and cardiovascular adverse events</i> |                                                                                                                                                              |
| • Atrial fibrillation and flutter                                                     | 427.3                                                                                                                                                        |
| • CHF                                                                                 | 398.91, 402.01, 402.11, 402.91, 404.01, 404.03, 404.11, 404.13, 404.91, 404.93, 425.4–425.9, 428.x                                                           |
| • Chronic Pulmonary disease                                                           | 416.8, 416.9, 490.x–505.x, 506.4, 508.1, 508.8                                                                                                               |
| • Stroke                                                                              | 362.34, 430.x–438.x                                                                                                                                          |
| • Diabetes                                                                            | 250.x                                                                                                                                                        |
| • Renal disease                                                                       | 403.01, 403.11, 403.91, 404.02, 404.03, 404.12, 404.13, 404.92, 404.93, 582.x, 583.0–583.7, 585.x, 586.x, 588.0, V42.0, V45.1, V56.x                         |
| • Diverticulosis                                                                      | 562.10, 562.12                                                                                                                                               |
| • Obesity                                                                             | 278.0                                                                                                                                                        |
